# Supplementary material for: Design and tuning Cr3+-doped near-infrared phosphors for multifunctional applications via crystal field engineering
Source: Royal Society of Chemistry journal article supplement (doi:10.1039/d1dt03461h), 2022-01-01
Supplement: d1dt03461h1.pdf [file d1dt03461h1.pdf]

## Design and tuning of Cr<sup>3+</sup>-doped near-infrared phosphors for multifunctional applications via crystal field engineering

Shuaishuai Yu<sup>a,b</sup>, Zhiting Wei<sup>a</sup>, Junxiao Wu<sup>a</sup>, Tianli Wang<sup>a</sup>, Jia Zhang<sup>a</sup>, Xingliang  
Luo<sup>a</sup>, Yanyan Li<sup>a,\*</sup>, Chuang Wang<sup>b,\*</sup>, Lei Zhao<sup>a,\*</sup>

School of Physics and Opto-Electronic Technology, Collaborative Innovation Center  
of Rare-Earth Optical Functional Materials and Devices Development, Baoji  
University of Arts and Sciences, Baoji, Shaanxi 721016, P. R. China

a. College of Chemistry and Materials Engineering, Bohai University, Jinzhou,  
121000, P. R. China.

\* Corresponding author' email: [shuishouly@126.com](mailto:shuishouly@126.com) (Yanyan Li),  
[wangchuangbhu@163.com](mailto:wangchuangbhu@163.com) (Chuang Wang), [zhaoleibjwl@163.com](mailto:zhaoleibjwl@163.com) (Lei Zhao)

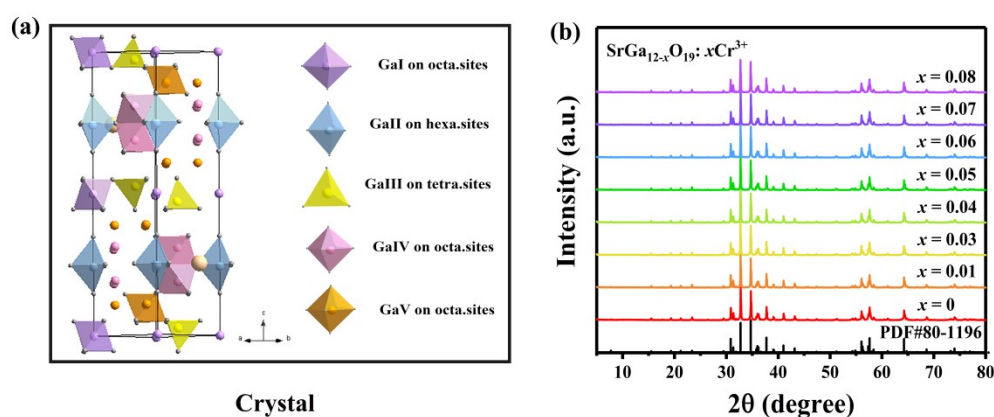

**Figure S1** (a) Crystal structure of SrGa<sub>12</sub>O<sub>19</sub>. (b) XRD patterns of SGO: x Cr<sup>3+</sup> ( $0 \leq x \leq 0.08$ ) samples and standard data of SGO phase (PDF No. 80-1196).

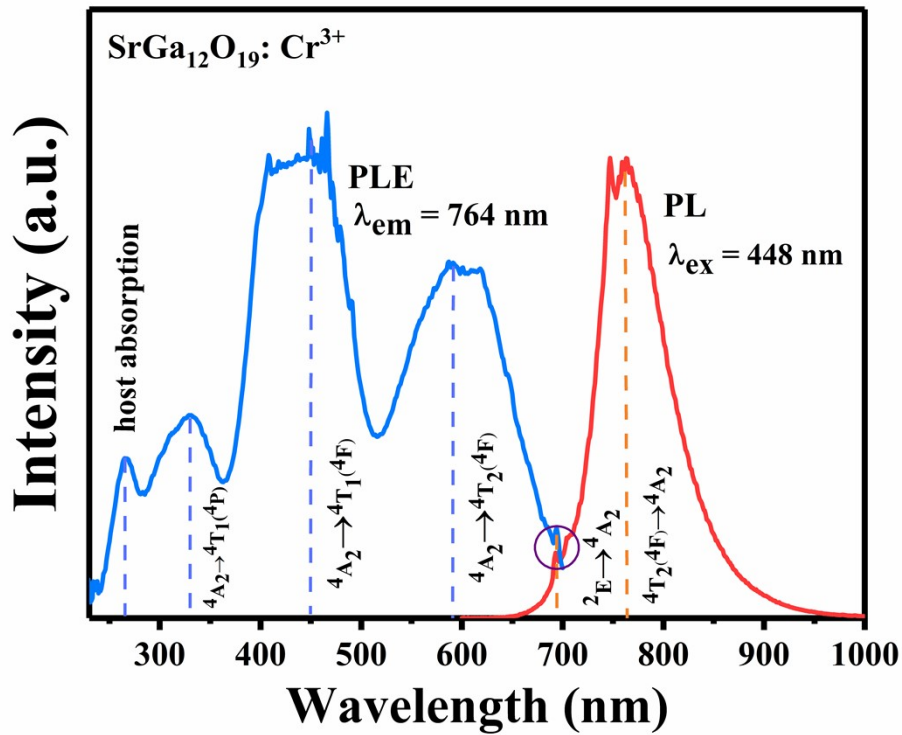

Figure S2 PL and PLE spectra of SGO: Cr<sup>3+</sup>.

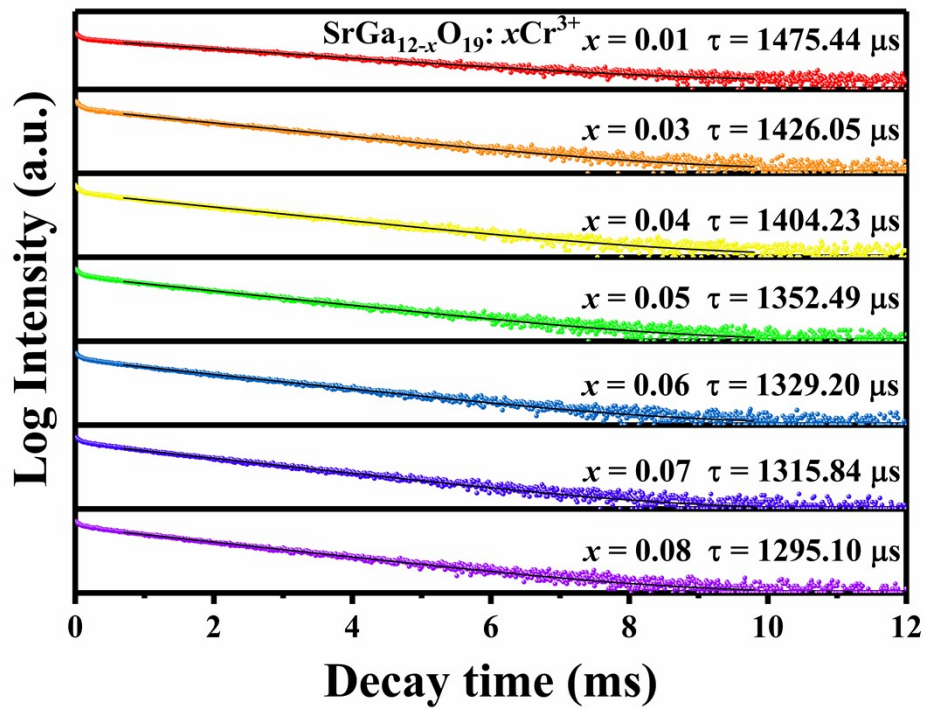

Figure S3 Decay curves of SGO: xCr<sup>3+</sup> ( $0 \leq x \leq 0.08$ ).

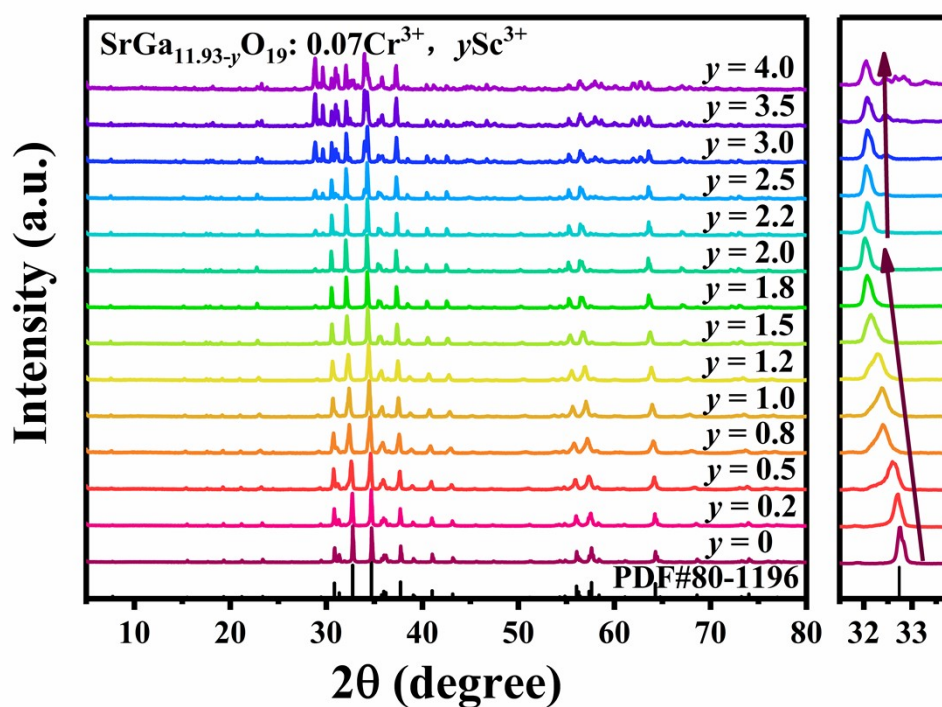

**Figure S4** XRD patterns of SGO:  $0.07\text{Cr}^{3+}, y\text{Sc}^{3+}$  ( $0 \leq y \leq 4.0$ ) samples and standard data of SGO phase (PDF No. 80-1196).

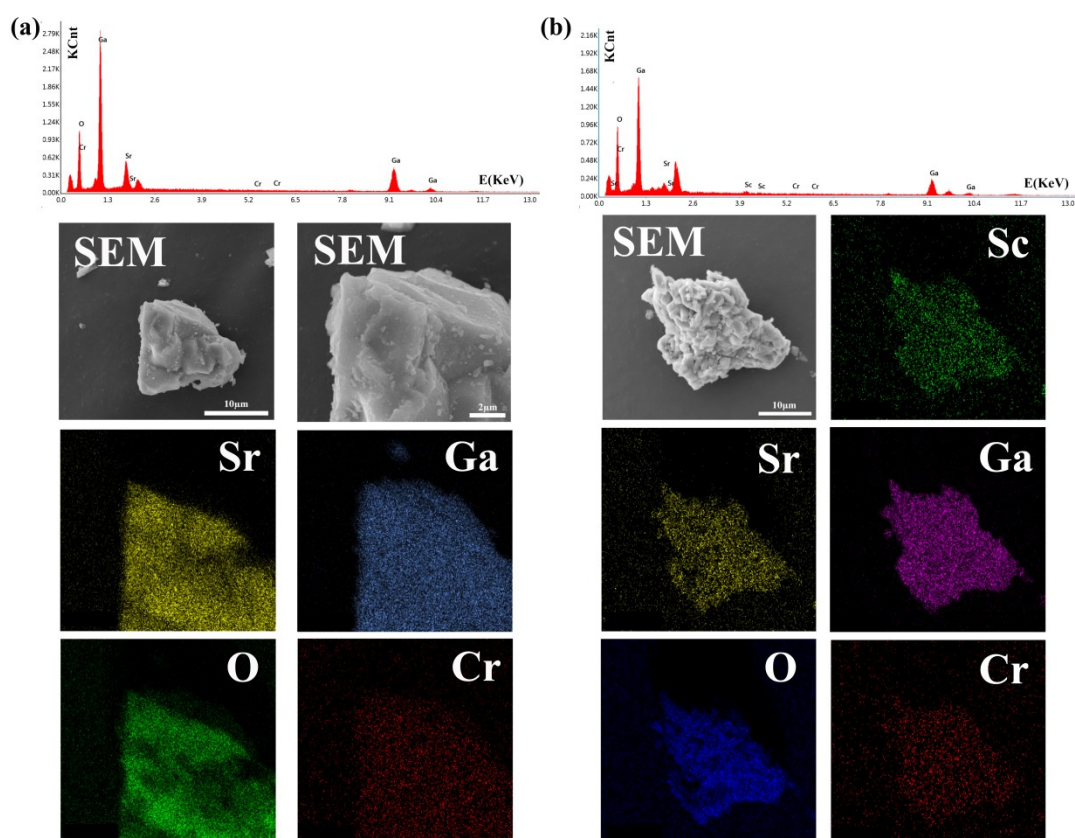

**Figure S5.** (a) EDS pattern, SEM images and Elemental mapping for SGO:  $0.07\text{Cr}^{3+}$ .

(b) EDS pattern, SEM image and Elemental mapping for SGO: 0.07Cr<sup>3+</sup>, 0.8Sc<sup>3+</sup>.

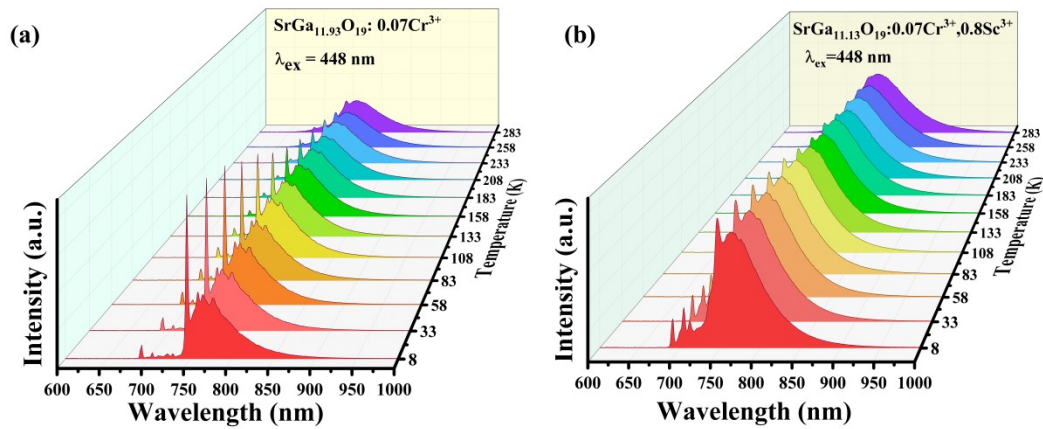

Figure S6 (a) PL spectra at 8 K-283 K for SGO: 0.07Cr<sup>3+</sup>. (b) PL spectra at 8 K-283 K for SGO: 0.07Cr<sup>3+</sup>, 0.8Sc<sup>3+</sup>.

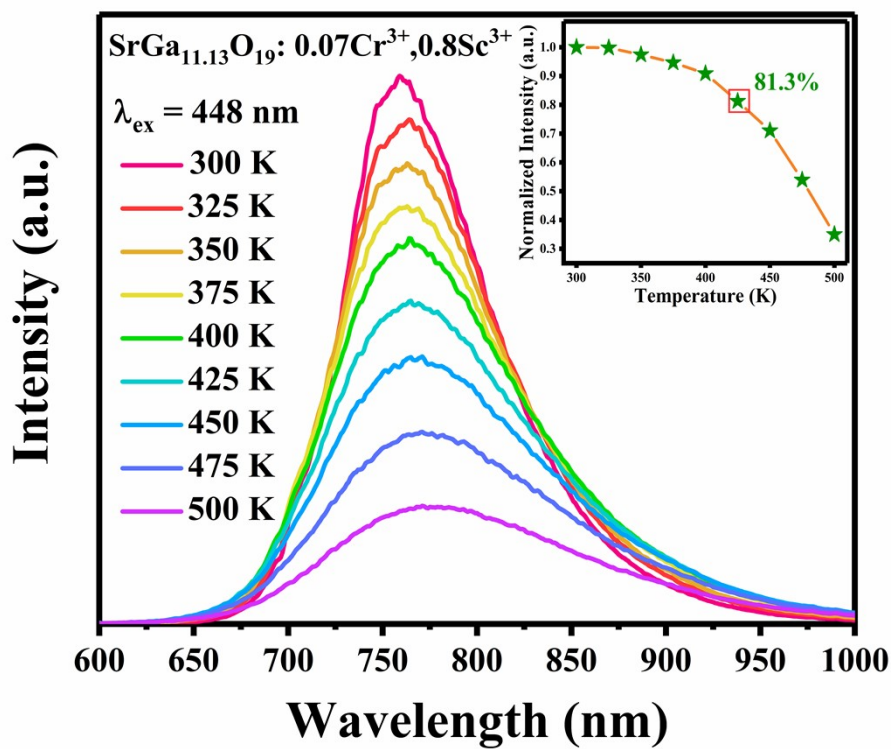

Figure S7 Temperature-dependent PL spectra of SGO: 0.07Cr<sup>3+</sup>, 0.8Sc<sup>3+</sup>.

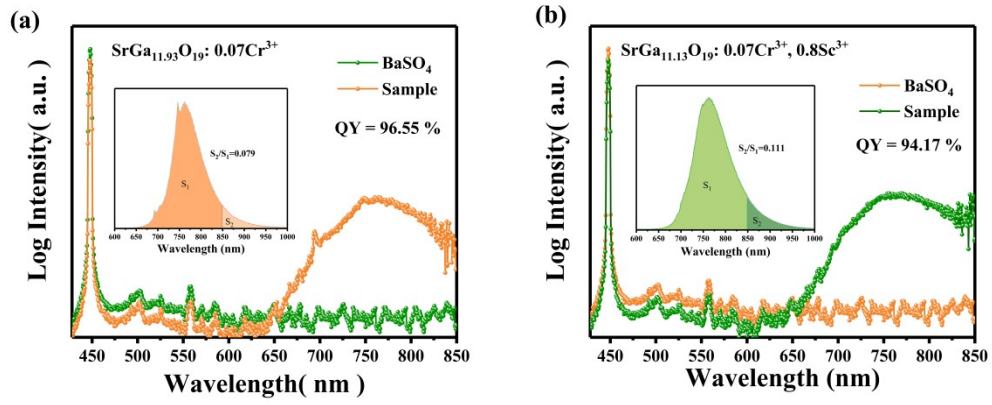

**Figure S8** The quantum efficiency spectra of (a) SGO:  $0.07\text{Cr}^{3+}$  (b) SGO:  $0.07\text{Cr}^{3+}$ ,  $0.8\text{Sc}^{3+}$ .
